# Supplementary material for: Bimanual movements in children with cerebral palsy: a systematic review of instrumented assessments
Source: Springer Nature journal article supplement (doi:10.1186/s12984-023-01150-7), 2023-02-27
Supplement: MOESM1 [file 24071216]

## Additional File 1: Search strategy

| # | Text type | Pubmed                                                                                                                                                                                                                                                                                                                                                 |                  | Scopus                                                                                                                                                                                                                                                                                                                                                                                                                                               |                  | Web of science                                                                                                                                                                                                                                                                                                                                                                                                                                          |                  | Cochrane Library                                                                                                                                                                                                                                                                                                                                         |                |
|---|-----------|--------------------------------------------------------------------------------------------------------------------------------------------------------------------------------------------------------------------------------------------------------------------------------------------------------------------------------------------------------|------------------|------------------------------------------------------------------------------------------------------------------------------------------------------------------------------------------------------------------------------------------------------------------------------------------------------------------------------------------------------------------------------------------------------------------------------------------------------|------------------|---------------------------------------------------------------------------------------------------------------------------------------------------------------------------------------------------------------------------------------------------------------------------------------------------------------------------------------------------------------------------------------------------------------------------------------------------------|------------------|----------------------------------------------------------------------------------------------------------------------------------------------------------------------------------------------------------------------------------------------------------------------------------------------------------------------------------------------------------|----------------|
|   |           | Search word                                                                                                                                                                                                                                                                                                                                            | Hits             | Search word                                                                                                                                                                                                                                                                                                                                                                                                                                          | Hits             | Search word                                                                                                                                                                                                                                                                                                                                                                                                                                             | Hits             | Search word                                                                                                                                                                                                                                                                                                                                              | Hits           |
| 1 | Mesh      | "Child"[Mesh] OR "Adolescent"[Mesh] OR "Infant"[Mesh]                                                                                                                                                                                                                                                                                                  | 3,691,623        | /                                                                                                                                                                                                                                                                                                                                                                                                                                                    |                  |                                                                                                                                                                                                                                                                                                                                                                                                                                                         |                  | Mesh Descriptor: [Child] OR Mesh Descriptor: [Adolescent] OR Mesh Descriptor [Infant]                                                                                                                                                                                                                                                                    | 125,202        |
| 2 | Free text | Child*[text] OR Teen*[text] OR Infant [text] OR Adolescent*[text]                                                                                                                                                                                                                                                                                      | 4,319,563        | TITLE-ABS ( child* ) OR TITLE-ABS ( teen* ) OR TITLE-ABS ( infant* ) OR TITLE-ABS ( adolescent* ) OR TITLE-ABS ( bab* ) OR TITLE-ABS ( newborn* ) AND ( LIMIT-TO ( DOCTYPE , "ar" ) )                                                                                                                                                                                                                                                                | 2,391,293        | (((((AB=(Child*)) OR AB=(teen*)) OR AB=(adolescent*)) OR AB=(infant*)) OR AB=(newborn*)) OR TI=(child*)) OR TI=(adolescent*)) OR TI=(teen*)) OR TI=(infant*)) OR TI=(newborn*))                                                                                                                                                                                                                                                                         | 2,229,231        | (Child*):ti,ab, kw OR (Teen*):ti,ab, kw OR (Infant):ti,ab, kw OR (Adolescent*):ti,ab, kw OR (bab*):ti,ab, kw OR (newborn):ti,ab, kw                                                                                                                                                                                                                      | 279,986        |
| 3 |           | <b>#1 OR #2</b>                                                                                                                                                                                                                                                                                                                                        | <b>4,319,563</b> |                                                                                                                                                                                                                                                                                                                                                                                                                                                      | <b>2,391,293</b> | <b>#1 OR #2</b>                                                                                                                                                                                                                                                                                                                                                                                                                                         | <b>2,229,231</b> | <b>#1 OR #2</b>                                                                                                                                                                                                                                                                                                                                          | <b>279,986</b> |
| 4 | Mesh      | "Upper Extremity "[Mesh]                                                                                                                                                                                                                                                                                                                               | 171,813          | /                                                                                                                                                                                                                                                                                                                                                                                                                                                    |                  | /                                                                                                                                                                                                                                                                                                                                                                                                                                                       |                  | Mesh Descriptor : [Upper Extremity]                                                                                                                                                                                                                                                                                                                      | 7520           |
| 5 | Free text | Upper Limb*[text] OR "Upper Extremit**"[text] OR Upper Bod**[text] OR arm[text] OR bimanual[text] OR interlimb[text] OR hand*[text]                                                                                                                                                                                                                    | 936,642          | TITLE-ABS ( upper AND limb* ) OR TITLE-ABS ( upper AND extremit* ) OR TITLE-ABS ( upper AND bod* ) OR TITLE-ABS ( arm* ) OR TITLE-ABS ( bimanual ) OR TITLE-ABS ( interlimb ) OR TITLE-ABS ( hand* ) AND ( LIMIT-TO ( DOCTYPE , "ar" ) )                                                                                                                                                                                                             | 1,904,958        | (((((TI=(upper limb*)) OR TI=(upper extremit*)) OR TI=(upper body)) OR TI=(arm*)) OR TI=(bimanual)) OR TI=(interlimb*)) OR TI=(hand*)) OR AB=(upper limb*) OR AB=(upper extremit*) OR AB=(upper body)) OR AB=(bimanual)) OR AB=(interlimb*) OR AB=(hand*) OR AB=(arm*)                                                                                                                                                                                  | 1,901,922        | Upper Limb*[text] OR "Upper Extremit**"[text] OR Upper Bod**[text] OR arm[text] OR bimanual[text] OR interlimb[text] OR hand*[text]                                                                                                                                                                                                                      | 178,106        |
| 6 |           | <b>#4 OR #5</b>                                                                                                                                                                                                                                                                                                                                        | <b>1,004,247</b> |                                                                                                                                                                                                                                                                                                                                                                                                                                                      | <b>1,904,958</b> | <b>#4 OR #5</b>                                                                                                                                                                                                                                                                                                                                                                                                                                         | <b>1,901,922</b> | <b>#4 OR #5</b>                                                                                                                                                                                                                                                                                                                                          | <b>180,608</b> |
| 7 |           | <b>#3 AND #6</b>                                                                                                                                                                                                                                                                                                                                       | <b>168,436</b>   | <b>#3 AND #6</b>                                                                                                                                                                                                                                                                                                                                                                                                                                     | <b>102,894</b>   | <b>#3 AND #6</b>                                                                                                                                                                                                                                                                                                                                                                                                                                        | <b>77,724</b>    | <b>#3 AND #6</b>                                                                                                                                                                                                                                                                                                                                         | <b>27,731</b>  |
| 8 | Mesh      | "Movement"[Mesh:NoExp] OR "Motor Activity"[Mesh] OR "Movement disorders"[Mesh:noexp] OR "Motion"[Mesh]                                                                                                                                                                                                                                                 | 776,381          | /                                                                                                                                                                                                                                                                                                                                                                                                                                                    |                  | /                                                                                                                                                                                                                                                                                                                                                                                                                                                       |                  | "Movement"[Mesh:NoExp] OR "Motor Activity"[Mesh] OR "Movement disorders"[Mesh:noexp] OR "Motion"[Mesh]                                                                                                                                                                                                                                                   | 12,415         |
| 9 | Free text | "Movement"[text] OR Motor [text] OR Motion [text] OR "Kinematic**"[text] OR "Biomechanic**"[text] OR "Instrumented measurement"[text] OR "Inertial"[text] OR "Sensors"[text] OR "Acceleromet**"[text] OR " technolog**"[text] OR " spatio-temporal"[text] OR " temporo-spatial"[text] OR "smoothness"[text] OR "fluidity"[text] OR " trajectory"[text] | 1,683,059        | TITLE-ABS ( movement ) OR TITLE-ABS ( motor ) OR TITLE-ABS ( motion ) OR TITLE-ABS ( kinematic* ) OR TITLE-ABS ( biomechanic* ) OR TITLE-ABS ( instrumented AND measurement ) OR TITLE-ABS ( inertial ) OR TITLE-ABS ( sensors ) OR TITLE-ABS ( acceleromet* ) OR TITLE-ABS ( technolog* ) OR TITLE-ABS ( spatio-temporal ) OR TITLE-ABS ( temporo-spatial ) OR TITLE-ABS ( smoothness ) OR TITLE-ABS ( fluidity ) OR TITLE-ABS ( trajectory ) AND ( | 4,360,550        | ((((((((((((((((((((((TI=(Movement)) OR TI=(Motor)) OR TI=(Motion)) OR TI=(Kinematic*)) OR TI=(Biomechanic*)) OR TI=(Instrumented measurement)) OR TI=(Inertial)) OR TI=(Sensor*)) OR TI=(Acceleromet*)) OR TI=(technolog*)) OR TI=(spatio-temporal)) OR TI=(temporo-spatial)) OR TI=(smoothness)) OR TI=(fluidity)) OR TI=(trajectory)) OR AB=(Movement)) OR AB=(Motor)) OR AB=(Motion)) OR AB=(Kinematic*)) OR AB=(Biomechanic*)) OR AB=(Instrumented | 5,204,053        | "Movement"[text] OR Motor [text] OR Motion [text] OR "Kinematic**"[text] OR "Biomechanic**"[text] OR "Instrumented measurement"[text] OR "Inertial"[text] OR "Sensor**"[text] OR "Acceleromet**"[text] OR " technolog**"[text] OR " spatio-temporal"[text] OR " temporo-spatial "[text] OR "smoothness"[text] OR "fluidity"[text] OR " trajectory"[text] | 151,807        |

|                 |           |                                                                                                                                                              |                  |                                                                                                                                                                                                                                                            |                  |                                                                                                                                                                                                                                                                                                                     |                  |                                                                                                                                                             |                |
|-----------------|-----------|--------------------------------------------------------------------------------------------------------------------------------------------------------------|------------------|------------------------------------------------------------------------------------------------------------------------------------------------------------------------------------------------------------------------------------------------------------|------------------|---------------------------------------------------------------------------------------------------------------------------------------------------------------------------------------------------------------------------------------------------------------------------------------------------------------------|------------------|-------------------------------------------------------------------------------------------------------------------------------------------------------------|----------------|
|                 |           |                                                                                                                                                              |                  | LIMIT-TO ( DOCTYPE , "ar" ) )                                                                                                                                                                                                                              |                  | measurement)) OR AB=(Inertial)) OR AB=(Sensor*)) OR AB=(Acceleromet*)) OR AB=(technolog*)) OR AB=(spatio-temporal)) OR AB=(temporo-spatial)) OR AB=(smoothness)) OR AB=(fluidity)) OR AB=(trajectory)                                                                                                               |                  |                                                                                                                                                             |                |
| <b>10</b>       |           | <b>#8 OR #9</b>                                                                                                                                              | <b>2,023,656</b> |                                                                                                                                                                                                                                                            | <b>4,360,550</b> | <b>#8 OR #9</b>                                                                                                                                                                                                                                                                                                     | <b>5,204,053</b> | <b>#8 OR #9</b>                                                                                                                                             | <b>154,958</b> |
| <b>11</b>       |           | <b>#7 AND #10</b>                                                                                                                                            | <b>22,881</b>    | <b>#7 AND #10</b>                                                                                                                                                                                                                                          | <b>13,790</b>    | <b>#7 AND #10</b>                                                                                                                                                                                                                                                                                                   | <b>12,506</b>    | <b>#7 AND #10</b>                                                                                                                                           | <b>5,140</b>   |
|                 | Mesh      | "Cerebral Palsy"[Mesh] OR "Hemiplegia"[Mesh] OR "Quadriplegia"[Mesh]                                                                                         | 39,892           | /                                                                                                                                                                                                                                                          |                  | /                                                                                                                                                                                                                                                                                                                   |                  | "Cerebral Palsy"[Mesh] OR "Hemiplegia"[Mesh] OR "Quadriplegia"[Mesh]                                                                                        | 2,307          |
|                 | Free text | Cerebral Palsy [text] OR Hemipleg*[text] OR Hemiparesis [text] OR Quadripleg*[text] OR Tetrapleg*[text] OR Stroke[text] OR "Cerebrovascular accident" [text] | 376,232          | TITLE-ABS (cerebral AND palsy ) OR TITLE-ABS ( hemipleg* ) OR TITLE-ABS ( hemiparesis ) OR TITLE-ABS ( quadripleg* ) OR TITLE-ABS ( tetrapleg* ) OR TITLE-ABS ( stroke ) OR TITLE-ABS ( cerebrovascular AND accident ) AND ( LIMIT-TO ( DOCTYPE , "ar" ) ) | 313,799          | (((((TI=(hemipleg*) ) OR TI=(cerebral palsy)) OR TI=(hemiparesis)) OR TI=(quadripleg*)) OR TI=(tetrapleg*) OR TI=(stroke)) OR TI=(cerebrovascular accident)) OR AB=(cerebral palsy)) OR AB=(hemiparesis)) OR AB=(hemipleg*) OR AB=(quadripleg*) OR AB=(tetrapleg*) OR AB=(stroke)) OR AB=(cerebrovascular accident) | 361,541          | Cerebral Palsy [text] OR Hemipleg*[text] OR Hemipares* [text] OR Quadripleg*[text] OR Tetrapleg*[text] OR Stroke[text] OR "Cerebrovascular accident" [text] | 66,637         |
| <b>14</b>       |           | <b>#12 OR #13</b>                                                                                                                                            | <b>376,250</b>   | <b>#12 OR #13</b>                                                                                                                                                                                                                                          | <b>313,799</b>   | <b>#12 OR #13</b>                                                                                                                                                                                                                                                                                                   | <b>361,541</b>   | <b>#12 OR #13</b>                                                                                                                                           | <b>66,637</b>  |
| <b>15</b>       |           | <b>#11 AND #14</b>                                                                                                                                           | <b>2,209</b>     | <b>#11 AND #14</b>                                                                                                                                                                                                                                         | <b>1,923</b>     | <b>#11 AND #14</b>                                                                                                                                                                                                                                                                                                  | <b>1,753</b>     | <b>#11 AND #14</b>                                                                                                                                          | <b>959</b>     |
| <b>Combined</b> |           |                                                                                                                                                              | <b>6,844</b>     |                                                                                                                                                                                                                                                            |                  |                                                                                                                                                                                                                                                                                                                     |                  |                                                                                                                                                             |                |
