# Supplementary material for: Bimanual movements in children with cerebral palsy: a systematic review of instrumented assessments
Source: Springer Nature journal article supplement (doi:10.1186/s12984-023-01150-7), 2023-02-27
Supplement: MOESM3 [file 24071216]

### **Additional File 3: Quality score**

- 1 Aims and hypothesis clearly stated: clear (2), partial (1), no (0)
- 2 Was participant consensus obtained before the study?: yes (2), no/not stated (0)
- 3 Description of the participant recruitment: clear (2), partial (1), no (0)
- 4 Description of the sample: clear (2), partial (0.5-1.5), no (0)
- 5 Data acquisition: clear (2), partial (1), no (0)
- 6 Description of the movement analysis system (3DMA, sensors, etc.): clear (2), partial (1), no (0)
- 7 Description of marker locations: clear (2), partial (1), no (0)
- 8 Description of the movement tasks: clear (2), partial (1), no (0)
- 9 Data analysis (biomechanical model, method, software): clear (2), partial (1), no (0)
- 10 Main outcomes of the study clearly stated? clear (2), partial (1), no (0)
- 11 Description of the gold standard: clear (2), partial (1), no (0)
- 12 Statistical analysis: clear (2), partial (1), no (0)
- 13 Sample size calculation: yes (2), no (0)
- 14 Results interpretable (statistical significance)? yes (2), partial (1), no (0)
- 15 Description of study limits: yes (2), partial (1), no (0)
- 16 Key findings answer the initial objectives (conclusion clearly stated): yes (2), partial (1), no (0)
