# Supplementary material for: Bimanual movements in children with cerebral palsy: a systematic review of instrumented assessments
Source: Springer Nature journal article supplement (doi:10.1186/s12984-023-01150-7), 2023-02-27
Supplement: MOESM4 [file 24071216]

#### Additional File 4: Quality assessment of studies

|                              | 1 | 2 | 3 | 4 | 5 | 6 | 7 | 8 | 9 | 10 | 11 | 12 | 13 | 14 | 15 | 16 | Total score | % score |
|------------------------------|---|---|---|---|---|---|---|---|---|----|----|----|----|----|----|----|-------------|---------|
| Beani et al. 2020 [23]       | 2 | 2 | 2 | 2 | 2 | 2 | 2 | 1 | 1 | 2  | 1  | 1  | 0  | 2  | 2  | 2  | 26          | 81      |
| Cacioppo et al. 2020 [24]    | 2 | 2 | 2 | 2 | 2 | 2 | 2 | 2 | 2 | 2  | 2  | 2  | 0  | 2  | 2  | 2  | 30          | 94      |
| Cope et al. 2010 [30]        | 2 | 2 | 2 | 2 | 1 | 2 | 1 | 1 | 1 | 2  | 2  | 2  | 0  | 1  | 0  | 2  | 23          | 75      |
| Feltham et al. 2010a [31]    | 1 | 2 | 1 | 2 | 2 | 2 | 2 | 2 | 1 | 1  | 0  | 2  | 0  | 2  | 0  | 2  | 22          | 69      |
| Gaillard et al. 2019 [25]    | 2 | 2 | 2 | 2 | 2 | 2 | 2 | 2 | 2 | 2  | 2  | 2  | 0  | 2  | 2  | 2  | 30          | 94      |
| Gordon et al. 2007 [26]      | 1 | 2 | 2 | 2 | 2 | 2 | 2 | 2 | 1 | 2  | 2  | 1  | 0  | 2  | 2  | 1  | 26          | 81      |
| Howcroft et al. 2012b [32]   | 2 | 2 | 2 | 1 | 1 | 2 | 2 | 1 | 2 | 2  | 0  | 2  | 0  | 2  | 2  | 2  | 25          | 78      |
| Hung et al. 2004 [33]        | 2 | 2 | 1 | 2 | 2 | 1 | 2 | 2 | 2 | 2  | 0  | 1  | 0  | 1  | 0  | 1  | 21          | 66      |
| Hung et al. 2010 [34]        | 2 | 2 | 0 | 1 | 2 | 1 | 2 | 2 | 2 | 2  | 0  | 1  | 0  | 2  | 1  | 2  | 22          | 69      |
| Hung et al. 2011 [35]        | 1 | 2 | 2 | 2 | 2 | 1 | 2 | 2 | 2 | 2  | 1  | 2  | 0  | 2  | 1  | 2  | 25          | 78      |
| Hung et Meredith, 2014 [36]  | 1 | 2 | 1 | 2 | 2 | 2 | 2 | 2 | 2 | 2  | 0  | 1  | 0  | 2  | 0  | 2  | 21          | 66      |
| Hung et al. 2017a. [27]      | 2 | 2 | 2 | 2 | 2 | 1 | 2 | 2 | 2 | 2  | 0  | 1  | 0  | 2  | 2  | 2  | 26          | 81      |
| Hung et Spingarn, 2018 [37]  | 1 | 2 | 2 | 2 | 2 | 1 | 2 | 2 | 2 | 2  | 0  | 2  | 0  | 2  | 1  | 2  | 25          | 78      |
| Hung et al. 2018 [38]        | 1 | 2 | 2 | 2 | 2 | 2 | 2 | 1 | 2 | 2  | 0  | 1  | 0  | 2  | 1  | 1  | 23          | 75      |
| Hung et al. 2019 [28]        | 2 | 2 | 2 | 2 | 1 | 2 | 2 | 2 | 2 | 2  | 2  | 2  | 0  | 2  | 2  | 2  | 29          | 91      |
| Hung et Zeng, 2020. [39]     | 2 | 2 | 2 | 2 | 1 | 2 | 2 | 2 | 2 | 2  | 0  | 1  | 0  | 2  | 1  | 2  | 25          | 78      |
| Johansson et al. 2012 [40]   | 2 | 2 | 0 | 2 | 2 | 2 | 1 | 2 | 2 | 2  | 0  | 1  | 0  | 1  | 0  | 1  | 20          | 63      |
| Johansson et al. 2014 [41]   | 2 | 2 | 1 | 2 | 2 | 2 | 1 | 2 | 2 | 2  | 0  | 1  | 0  | 1  | 2  | 1  | 23          | 72      |
| Klotz et al, 2014 [42]       | 1 | 2 | 1 | 2 | 1 | 2 | 1 | 2 | 1 | 1  | 2  | 2  | 0  | 2  | 2  | 1  | 23          | 72      |
| Mutalib et al, 2019a. [43]   | 1 | 2 | 0 | 2 | 1 | 2 | 2 | 2 | 2 | 2  | 0  | 2  | 0  | 2  | 0  | 1  | 21          | 66      |
| Rudisch, et al, 2016 [29]    | 2 | 2 | 2 | 1 | 1 | 2 | 2 | 2 | 2 | 2  | 2  | 2  | 0  | 2  | 1  | 2  | 26          | 81      |
| Shum et al, 2020 [48]        | 2 | 2 | 0 | 2 | 2 | 1 | 0 | 1 | 0 | 1  | 0  | 2  | 0  | 0  | 1  | 1  | 15          | 47      |
| Smorenburg et al. 2011 [44]  | 2 | 2 | 1 | 2 | 1 | 2 | 2 | 2 | 0 | 2  | 0  | 1  | 0  | 1  | 1  | 1  | 20          | 63      |
| Smorenburg et al, 2012a [45] | 1 | 2 | 1 | 2 | 2 | 2 | 0 | 2 | 2 | 2  | 0  | 1  | 0  | 2  | 1  | 2  | 22          | 69      |
| Smorenburg et al, 2013 [46]  | 1 | 2 | 1 | 2 | 2 | 2 | 0 | 2 | 1 | 1  | 2  | 1  | 0  | 2  | 0  | 2  | 21          | 66      |
| Sugden et Utley, 1995 [49]   | 1 | 2 | 1 | 2 | 2 | 1 | 2 | 2 | 1 | 1  | 0  | 0  | 0  | 0  | 0  | 0  | 15          | 47      |
| Utley et Sugden,1998. [50]   | 1 | 1 | 1 | 2 | 2 | 2 | 1 | 1 | 1 | 1  | 0  | 1  | 0  | 1  | 0  | 0  | 15          | 47      |
| Utley et al. 2004 [51]       | 1 | 1 | 0 | 2 | 1 | 1 | 1 | 2 | 1 | 1  | 0  | 0  | 0  | 1  | 0  | 1  | 13          | 41      |
| Utley et al. 2007 [52]       | 1 | 1 | 0 | 2 | 1 | 2 | 1 | 2 | 1 | 1  | 0  | 0  | 0  | 1  | 0  | 1  | 14          | 44      |
| Van Thiel et al. 2001 [53]   | 1 | 0 | 1 | 1 | 1 | 2 | 1 | 2 | 2 | 1  | 0  | 1  | 0  | 1  | 0  | 1  | 15          | 47      |
| Volman et al., 2020 [47]     | 2 | 2 | 2 | 2 | 2 | 2 | 2 | 2 | 2 | 2  | 0  | 1  | 0  | 2  | 0  | 2  | 25          | 78      |
