# Supplementary material for: Bimanual movements in children with cerebral palsy: a systematic review of instrumented assessments
Source: Springer Nature journal article supplement (doi:10.1186/s12984-023-01150-7), 2023-02-27
Supplement: MOESM5 [file 24071216]

## Additional File 5: Synthesis of recommendations for quantitative bimanual assessments

### Recommendations for quantitative bimanual assessments

#### Measurements systems

- 3D motion analysis
- Out-of-laboratory measures
  - Accelerometers, sensors
  - Connected devices

#### Protocols

- 3-5 bimanual tasks
- Interaction with object (grasping, manipulating, holding)
- Different condition (speed, visual disturbance, etc.)
- Simple daily movements or playful situation
- Importance of environment
- Daily settings (home or school)

#### Parameters

- Combination of:
  - Kinematics
  - Quality of movement

With specific bilateral measure for bimanual situation
